# Supplementary material for: Systematic Literature Review of Clinical and Economic Outcomes of Micro-Invasive Glaucoma Surgery (MIGS) in Primary Open-Angle Glaucoma
Source: PubMed Central journal article supplement — Ophthalmol Ther. 2018 May 3;7(1):49–73. doi: 10.1007/s40123-018-0131-0 (PMC5997597; doi:10.1007/s40123-018-0131-0), 2018-05-03

**Supplementary Figure 1:** Reviewers' judgement for each risk-of-bias item as percentages across all RCTs.

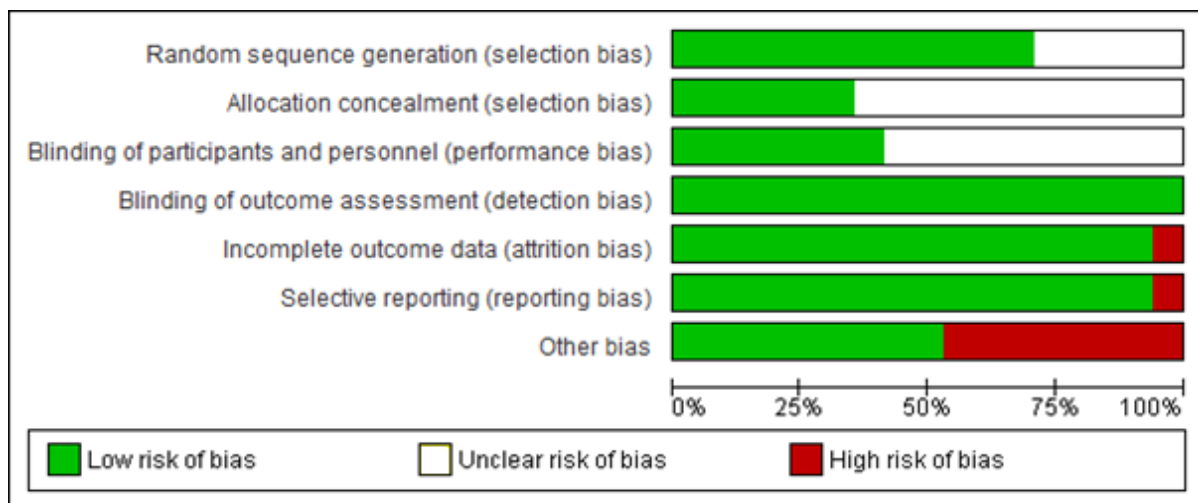

Supplement: 40123_2018_131_MOESM1_ESM.pdf [file 40123_2018_131_MOESM1_ESM.pdf]
